1 **Mobile Phone Dependence Syndrome and its**  
2 **influencing factors among middle school**  
3 **students in Guangzhou, China: a cross-**  
4 **sectional study**

5 Chang Wang<sup>1</sup>, Haiyuan Zhu<sup>2</sup>, Rong Lin<sup>1</sup>, Hui Liu<sup>1</sup>, Jinrong Li<sup>1</sup>,  
6 Minying Sun<sup>1</sup>, Weiquan Lin<sup>1</sup>, Qin Zhou<sup>1</sup>, Bing Huang<sup>3</sup>, Jierong  
7 Zhao<sup>3</sup>, Yingyu Yang<sup>4</sup>, Ying Li<sup>4</sup>, Runquan Zhang<sup>2</sup>, Qiqi Wu<sup>2</sup>,  
8 Xiaomei Dong<sup>2#</sup>

9

10 1Guangzhou Center for Disease Control and Prevention, Guangzhou, China;

11 2Department of Public Health and Preventive Medicine, School of Medicine, Jinan University,  
12 Guangzhou, China;

13 3Guangzhou Liwan District Center for Disease Control and Prevention, Guangzhou, China;

14 4 Guangzhou Nansha District Center for Disease Control and Prevention, Guangzhou, China;

15

16 #corresponding author: Xiaomei Dong

17 E-mail:ntydxm@126.com

18

## 19 **Abstract**

20           Background: Mobile Phone Dependence Syndrome (MPDS), a kind of addiction  
21 caused by extra phone use, is characterized by impairment of physical, mental, and  
22 social functioning. This study aimed to assess the prevalence of MPDS, injury due to  
23 overfocusing on phone, and explore MPDS's associated factors among middle  
24 school students in Guangzhou, China. Methods: 1928 questionnaires were collected  
25 from April 2023 to May 2023 in Liwan and Nansha districts of Guangzhou through  
26 multi-stage cluster sampling. We used the Mobile Phone Dependence Scale for  
27 Middle School Students (MPDS Scale) and analyzed its reliability and validity.  
28 Frequency distribution, Chi-square test, fisher exact test and binary logistic  
29 regression were performed in data analysis. Results: The reliability and validity of the  
30 MPDS Scale were good. The prevalence of MPDS was 10.0% and injury rate  
31 because of overfocusing on phone is 11.9%. Binary logistic regression demonstrated  
32 that gender, grade, personality, father's parenting style, time of mobile phone use on  
33 rest days, and the most important motivation for using phone might influence  
34 occurrence of MPDS among middle school students ( $P<0.05$ ). Conclusion:  
35 Prevalence of MPDS among middle school students in Guangzhou was at a low level  
36 relatively. Students with MPDS had higher injury proportion than students with no

37 MPDS. Female gender, grade of senior high school, introverted character, fathers  
38 with authoritarian parenting styles, spending 6 hours above on phone on rest days,  
39 and motivation of entertainment for using phone were associated with occurrence of  
40 MPDS. These findings can help develop measures to reduce occurrence of MPDS.

41       Keywords: Guangzhou; middle school students; Mobile Phone Dependence  
42 Syndrome; mobile phone use

43

44

## 45 **Introduction**

46 Mobile phones, in recent years, are rapidly gaining popularity due to their  
47 powerful features. While bringing convenience to our life, mobile phone brings us a  
48 series of negative health-related concerns, of which Mobile Phone Dependence  
49 Syndrome (MPDS) is the most concerning. Billieux et al. [1] defined mobile phone  
50 addiction (MPA) as “symptoms of deregulated use, negative impact on various  
51 aspects of daily life”. There is still no uniform definition for the psychological problems  
52 caused by excessive use of mobile phones in academic studies worldwide. However,  
53 it is a psychosomatic disorder that manifests itself primarily in the excessive use of  
54 mobile phones, which leads to obvious impairment of individual’s physiological,  
55 psychological and social functions, such as eyes hurting, anxiety, depression [2], and  
56 it can even lead to injury occurrence. For example, paying too much attention on  
57 phone can be a distraction that may result in injuries while walking and crossing the  
58 street [3]. It is also a behavioral addiction that mainly involves cognitive and  
59 emotional effects and is considered similar to Internet addiction [4-7]. Several studies  
60 used terms such as mobile phone abuse (MPA), problematic smartphone use (PSU),  
61 and mobile phone dependence syndrome (MPDS) to describe the mental health  
62 problems arising from excessive mobile phone use [2, 8]. In this study, we adopted  
63 the definition—Mobile Phone Dependence Syndrome (MPDS), which is given by Dr.

64 Shi of the Xi'an Mental Health Center [9]. He defined that MPDS is a kind of addiction  
65 caused by the beyond-control mobile phone use, accompanied by the significant  
66 impairment of function in physical, mental and social.

67 Lots of studies [10-13] showed that among the mobile phone users worldwide,  
68 middle school students are undoubtedly the new mainstream group. Since middle  
69 school students are in a period of rapid psychological and physiological development,  
70 they are more vulnerable to excessive use of mobile phones than other populations  
71 and thus develop MPDS. And about measurement tool of mobile phone dependence  
72 problem, the scales that currently exist are MPPUS, MPDI, PMPUQ [14-16], etc.  
73 Considering the specific definition of mobile phone dependence and based on the  
74 foreign and domestic scales about phone dependence, Chinese scholar Xiaohui  
75 Wang [17] developed Mobile Phone Dependence Scale for Middle School Students  
76 (MPDS Scale), which filled the blank of phone dependence scale for middle school  
77 students in China and it was applied by some scholars in study [18].

78 An article [19] reviewed a large body of literature, which covered 12 countries or  
79 cities from Asia, Europe and Africa, such as Japan, Korea, Italy and Tunisia, and  
80 found that the prevalence of mobile phone abuse and MPDS ranged from 0%~38%.  
81 For example, a study of Italy including 2853 objects showed that the overall  
82 prevalence of problematic mobile phone use was 6.3% [20]. Another study [21]

83 reported that the rate of mobile phone dependence among high school students in  
84 Madrid was 20.0% (26.1% in females, 13.0% in males). In 2004, a survey covered  
85 123 junior high schools with 747 students in South Korea [22] showed that 89.7% of  
86 the students used mobile phones and 15.7% were addicted to mobile phones. In  
87 addition, a survey in Spain of showed that 14.8% of adolescents aged 12-18 years  
88 had problems with mobile phone use [5]. The rate of mobile phone dependence  
89 among Chinese adolescents estimated by Tao et al. was 26.2% [6]. In addition, a  
90 study conducted in 2021 among senior high students in Guangzhou reported that  
91 students with mobile phone dependence account for 13.5% [23].

92 In recent years, mobile phones are increasingly involved in learning, social  
93 interaction and entertainment of middle school students. Overuse of mobile phone  
94 will lead to dependence on phones, causing negative effects. MPDS in adolescents  
95 has caused widespread concern in society and it is undoubtedly a public health issue  
96 that is becoming increasingly prominent. Addictive behaviors have been determined  
97 to be influenced by social determinants and cultural factors [24]. Rare research to  
98 date has reported the prevalence of mobile phone dependence among middle school  
99 students in economically developed city of China. For discovering the focus of  
100 education and promote the physical and mental health of middle school students, this  
101 study on MPDS and exploring its influencing factors of students was carried out.

102

103

104

## 105 **Objects and Methods**

### 106 **Objects selection and sampling method**

107 Our target objects were middle school students in Guangzhou. Middle  
108 school in this study refers to the school in China' mainland who provides secondary  
109 education and can be divided into junior high school and senior high school. This  
110 study conducted among junior and senior high school students. The research was  
111 conducted from April to May 2023 and the objects were selected by multi-stage  
112 cluster random sampling. Our sampling procedure is shown in the following  
113 figure(fig.1)

114

115 [ fig 1. The flowchart of sampling process in this study ]

### 116 **Sample size estimation**

117 In this study, based on the prevalence of middle school students' mobile phone  
118 use dependence reported by the study of Shuman Tao [6], we set the expected  
119 prevalence of MPDS among middle school students in Guangzhou as 25.0%. Then  
120 we used the formula of simple random sampling to estimate the sample size. We set  
121  $\alpha$  equal to 0.05 and d equal to 0.15p.



122 
$$n = \frac{Z_{\alpha}^2 p(1-p)}{d^2}$$

123 The result is that n is equal to 513. We increased the sample size by half on the  
124 basis of calculation result above, considering that our sampling method is multi-stage  
125 cluster sampling (n=770). We also took into account that the response rate is at 90%  
126 around so we figured out that the sample size of this survey should be at least 856  
127 students.

128

129

## 130 **Research tools**

### 131 **Self-designed questionnaire**

132 (1) Personal information: including gender, age, grade, and ethnicity, etc.

133 (2) Family information: including family residence, parental educational  
134 background, parenting styles, parental care for child, whether they are an only child.

135 (3) Mobile phone use: including the number of mobile phones owned, time spent  
136 on mobile phone, and the amount of Internet traffic used per month, etc.

137 (4) Consequences of mobile phone use: including aching fingers, eyes blurred or  
138 hurting, tinnitus, being injured because of overfocusing on phone (such as hitting on  
139 trees).

#### 140 **Mobile Phone Dependence Scale for Middle School Students**

141 This scale [17] assesses students' dependence degree on mobile phone in  
142 terms of three dimensions: abstinence, compulsivity and prominence. It consists of  
143 16 items. Each item is rated on a five-level Likert scale ranging from "not at all  
144 consistent" to "completely consistent". The total score for this scale is 80, and  
145 students are considered to have Mobile Phone Dependence Syndrome if their scores  
146 are over 48. The Cronbach's coefficient of this scale in this study was 0.88.

147 The three dimensions of the scale are defined as follows:

148 (1) Abstinence refers to the emotional reactions that occurs when one is  
149 suddenly forced to be unable to use his phone or is unable to use it normally, such as  
150 anxiety, irritability, etc.

151 (2) Compulsivity refers to the fact that a person has a strong desire and urge to  
152 use the mobile phone and is difficult to extricate himself, or even has a delusion.

153 (3) Prominence means that the behavior of individual is dominated by the use of  
154 mobile phone, which mainly manifested as phone overuse and checking phone  
155 excessively in daily life.

## 156 **Research content**

157 Xiaohui Wang's Mobile Phone Dependence Scale for Middle School Students  
158 (MPDS Scale) may have different factor structures in different regions, as well as in  
159 different sample. Therefore, this study validated the reliability and validity of the scale  
160 at first.

161 The scores of MPDS Scale of participating students were described using  
162 means and median. The prevalence of MPDS and injury caused by overfocusing on  
163 phone was revealed through statistical description, and the influencing factors of  
164 MPDS were investigated through univariate analysis and multivariate analysis.

165

166

167

168

## 169 **Quality control**

170 A pre-survey of the target population was initiated before the survey began for  
171 modifying the self-designed questionnaire, and the investigators were trained in a  
172 uniform manner. The strong support of the related personnel of the school was  
173 sought to ensure the compliance of objects and the authenticity of the survey data.  
174 After finishing, investigators checked the questionnaire one by one in the classrooms.  
175 When missing items or logical errors were found, investigators would ask students to  
176 supplement or correct them immediately. During the process of data analysis, our  
177 exclusion criteria is : (1) Students who did not complete Mobile Phone Dependence  
178 Scale for Middle School Students (one item missing is allowed); (2) Students who did  
179 not answer the multiple-choice questions in a logical and serious manner.

## 180 **Statistical Methods**

### 181 **Scale reliability and validity test**

182 The reliability coefficient test was performed using SPSS 26.0, while the sample  
183 was subjected to confirmatory factor analysis using Amos 26.0.

## 184 **Statistical analyses**

185 SPSS 26.0 was used for data analysis. Objects with one missing item of MPDS  
186 Scale in the validated questionnaire were interpolated using mean values. We  
187 compared the distribution of MPDS between participants with different  
188 characteristics, as well as consequences of mobile phone use in MPDS group and  
189 non-MPDS group by chi-square or fisher exact test. Binary logistic regression model  
190 was used to identify factors associated MPDS, and the independent variables  
191 included in the model were identified based on relevant studies and univariate  
192 analysis. The odds ratio (*OR*) and 95% confidence intervals (95% CI) were used to  
193 estimate the effects of the independent variables. The significant level was 0.05(two-  
194 tailed).

## 195 **Ethical considerations**

196 Ethical approval for the current study was obtained from Ethics Committee of  
197 Guangzhou Center for Disease Control and Prevention, China (approval number: GZCDC-  
198 ECHR-2024P0095). This study has obtained verbal consent from the participants and their  
199 guardians. The researchers had informed the participants (and their legal guardian) of the  
200 research background, purpose, steps, risks and benefits of the project. They had enough  
201 time to read the informed consent and discuss with others and they had the rights to get

202 the answers of their any questions about the study from researchers. After ensuring that  
203 the participant fully understood all aspects of the study, they verbally expressed their  
204 willingness to participate by stating, “I **consent.**” and then they had right to decide whether  
205 to fill out the questionnaire. The participants (or legal guardian) were able to quit from the  
206 study if they wanted at any time.

207

## 208 **Results**

### 209 **Basic information of survey respondents**

210 A total of 1928 questionnaires were collected, of which 1883 questionnaires  
211 were defined valid. The effective rate was 97.67%. The mean age of sample was  
212 15.33 years ( $SD=1.71$  years). Our study found that the prevalence of MPDS among  
213 middle school students in Guangzhou was 10.0%.

### 214 **Reliability and validity test of Mobile Phone Dependence**

#### 215 **Scale for Middle School Students (N=1883)**

216 The Cronbach's coefficient of the MPDS Scale of sample is 0.880 and the split-  
217 half reliability is 0.859, which indicated that the reliability of scale is good. Since the  
218 MPDS Scale is a well-established scale, a confirmatory factor analysis can be  
219 conducted for the original.

220 We used Amos.26 to conduct confirmatory factor analysis on the study sample.  
221 The fit indices of the MPDS Scale meet the index standard (online supplemental  
222 table 1), indicating that the scale is suitable for sample of our study.

223 **Scores of MPDS Scale among middle school students in**  
224 **Guangzhou (N=1883)**

225 The mean score of MPDS Scale of the participants was 35.74 and the median  
226 was 35. No matter in all participants or the participants with MPDS, the mean score  
227 for each item of prominence was the highest, followed by abstinence and then  
228 compulsivity.

229 Table 1 Scores of each item at different dimensions of MPDS Scale

| Scales and Dimensions | All participants |       |        | Participants with MPDS |      |        |
|-----------------------|------------------|-------|--------|------------------------|------|--------|
|                       | MEAN             | SD    | MEDIAN | MEAN                   | SD   | MEDIAN |
| Abstinence            | 2.12             | 0.88  | 2.00   | 3.64                   | 0.64 | 3.50   |
| Compulsivity          | 1.71             | 0.71  | 1.60   | 2.77                   | 0.80 | 2.80   |
| Prominence            | 2.90             | 0.80  | 3.00   | 3.89                   | 0.50 | 3.80   |
| Total Score           | 35.74            | 10.61 | 35.00  | 55.06                  | 5.90 | 54.00  |

230 **The comparison of consequences of mobile phone use**

231 The results showed that there were differences in the consequences of phone  
232 use between the two groups (table 2). The rate of being injured due to overfocusing  
233 on phone in MPDS group is 29.4%, significantly higher than another group (10%).  
234 The findings proved that excessive attention to mobile phone not only causes  
235 adverse physical effects, but also may lead to injuries, such as hitting a tree and fall.

236

237



238  
239  
240  
241

242 Table 2 Comparison of consequences of mobile phone use among middle school  
243 students in Guangzhou (n/%)

| Consequences of mobile phone use               | Total n *(%) | Non-MPDS group | MPDS group | $\chi^2$ | P value |
|------------------------------------------------|--------------|----------------|------------|----------|---------|
| Aching fingers                                 |              |                |            |          |         |
| Yes                                            | 227(12.1)    | 172(10.2)      | 55(29.4)   | 58.323   | <0.001  |
| No                                             | 1646(87.9)   | 1514(89.8)     | 132(70.6)  |          |         |
| Eyes blurred or hurting                        |              |                |            |          |         |
| Yes                                            | 630(33.6)    | 522(30.9)      | 108(57.8)  | 54.318   | <0.001  |
| No                                             | 1245(66.4)   | 1166(69.1)     | 79(42.2)   |          |         |
| Tinnitus                                       |              |                |            |          |         |
| Yes                                            | 150(8.0)     | 116(6.9)       | 34(18.2)   | 29.258   | <0.001  |
| No                                             | 1725(92.0)   | 1572(93.1)     | 153(81.8)  |          |         |
| Being injured because of overfocusing on phone |              |                |            |          |         |
| Yes                                            | 223(11.9)    | 168(10.0)      | 55(29.4)   | 60.423   | <0.001  |
| No                                             | 1646(88.1)   | 1514(90.0)     | 132(70.6)  |          |         |

244 \*There are a little data missing

245 **Univariate analysis of MPDS among middle school students**  
246 **in Guangzhou (N=1883))**

247 We found in our study that the prevalence of MPDS is 10.0%. The results (table  
248 3) showed that in the individual characteristics, there were differences in the  
249 distribution of MPDS among middle school students in genders, grades,  
250 personalities, evaluation of current study pressure and academic achievements  
251 ( $P<0.05$ ).

252 In the comparison of family conditions among MPDS group and non-MPDS  
 253 group (table 4), differences were found in fathers' levels of education, parenting  
 254 styles and degrees of care for their children( $P<0.05$ ).

255 In terms of mobile phone use (table 5), numbers of mobile phones owned, years  
 256 of mobile phone ownership, daily mobile phone use time, the motivation and  
 257 application of using mobile phone, and monthly Internet traffic were found to be  
 258 different between MPDS group and non-MPDS group( $P<0.05$ ).

259

260

261

262 Table 3 Distribution and comparison of MPDS among middle school students in  
 263 Guangzhou of personal characteristics (N=1883; n/%)

| Variables              | Total n (%) | Non-MPDSgroup<br>(n=1694) | MPDSgroup<br>(n=189) | Fisher*<br>/ $\chi^2$ | P value |
|------------------------|-------------|---------------------------|----------------------|-----------------------|---------|
| Gender                 |             |                           |                      |                       |         |
| Male                   | 1035(55.0)  | 950(56.1)                 | 85(45.0)             | 8.473                 | 0.004   |
| Female                 | 848(45.0)   | 744(43.9)                 | 104(55.0)            |                       |         |
| Grade                  |             |                           |                      |                       |         |
| Junior high school     | 873(46.4)   | 809(47.8)                 | 64(33.9)             | 13.200                | <0.001  |
| Senior high school     | 1010(53.6)  | 885(52.2)                 | 125(66.1)            |                       |         |
| Household registration |             |                           |                      |                       |         |
| Guangzhou              | 992(52.7)   | 883(52.1)                 | 109(57.7)            | 2.099                 | 0.147   |
| Non-Guangzhou          | 891(47.3)   | 811(47.9)                 | 80(42.3)             |                       |         |
| Whether live in school |             |                           |                      |                       |         |
| Yes                    | 611(32.4)   | 542(32.0)                 | 69(36.5)             | 1.580                 | 0.209   |
| No                     | 1272(67.6)  | 1152(68.0)                | 120(63.5)            |                       |         |

|                                      |            |            |           |        |        |  |
|--------------------------------------|------------|------------|-----------|--------|--------|--|
| Are you an only child                |            |            |           |        |        |  |
| Yes                                  | 519(27.6)  | 470(27.7)  | 49(25.9)  | 0.282  | 0.596  |  |
| No                                   | 1364(72.4) | 1224(72.3) | 140(74.1) |        |        |  |
| Monthly living expenses              |            |            |           |        |        |  |
| <500                                 | 1427(75.8) | 1297(76.6) | 130(68.8) |        |        |  |
| 500~999                              | 276(14.7)  | 239(14.1)  | 37(19.6)  | 5.871  | 0.118  |  |
| 1000~1499                            | 95(5.0)    | 84(5.0)    | 11(5.8)   |        |        |  |
| ≥1500                                | 85(4.5)    | 74(4.4)    | 11(5.8)   |        |        |  |
| Character                            |            |            |           |        |        |  |
| Uncertain                            | 703(37.3)  | 637(37.6)  | 66(34.9)  | 8.016  | 0.018  |  |
| Outgoing                             | 690(36.6)  | 632(37.3)  | 58(30.7)  |        |        |  |
| Introverted                          | 490(26.0)  | 425(25.1)  | 65(34.4)  |        |        |  |
| Getting along with classmates        |            |            |           |        |        |  |
| Very easy                            | 754(40.0)  | 690(40.7)  | 64(33.9)  | 5.537  | 0.063  |  |
| Fairly easy                          | 1016(54.0) | 908(53.6)  | 108(57.1) |        |        |  |
| Not easy                             | 113(6.0)   | 96(5.7)    | 17(9.0)   |        |        |  |
| Frequency of socializing with people |            |            |           |        |        |  |
| Frequently                           | 996(52.9)  | 903(53.3)  | 93(49.2)  | 3.004  | 0.220  |  |
| Occasionally                         | 838(44.5)  | 750(44.3)  | 88(46.6)  |        |        |  |
| Never                                | 49(2.6)    | 41(2.4)    | 8(4.2)    |        |        |  |
| Academic performance                 |            |            |           |        |        |  |
| Top 25% in grade                     | 585(31.1)  | 529(31.2)  | 56(29.6)  |        |        |  |
| 26%~50% in grade                     | 587(31.2)  | 541(31.9)  | 46(24.3)  | 13.503 | 0.004  |  |
| 51%~75% in grade                     | 508(27.0)  | 455(26.9)  | 53(28.0)  |        |        |  |
| 76%~100% in grade                    | 203(10.8)  | 169(10.0)  | 34(18.0)  |        |        |  |
| Frequency of physical activity       |            |            |           |        |        |  |
| Once a day                           | 491(26.1)  | 437(25.8)  | 54(28.6)  | 5.161  | 0.156  |  |
| 3~6 times a week                     | 848(45.0)  | 777(45.9)  | 71(37.6)  |        |        |  |
| 1~3 times a week                     | 500(26.6)  | 441(26.0)  | 59(31.2)  |        |        |  |
| Never play sports                    | 44(2.3)    | 39(2.3)    | 5(2.6)    |        |        |  |
| Evaluation of current study pressure |            |            |           |        |        |  |
| Low/no stress                        | 61(3.2)    | 53(3.1)    | 8(4.2)    | 22.593 | <0.001 |  |
| Appropriate stress                   | 1044(55.4) | 970(57.3)  | 74(39.2)  |        |        |  |
| Heavy/very heavy stress              | 778(41.3)  | 671(39.6)  | 107(56.6) |        |        |  |

| Understanding of MPDS                    |           |           |           |       |       |
|------------------------------------------|-----------|-----------|-----------|-------|-------|
| Understood                               | 466(24.7) | 427(25.2) | 39(20.6)  |       |       |
| Had heard of it, but didn't know details | 979(52.0) | 875(51.7) | 104(55.0) | 1.913 | 0.384 |
| Didn't know                              | 438(23.3) | 392(23.1) | 46(24.3)  |       |       |

264 \*Fisher: Fisher exact test

265

266

267

268

269 Table 4 Distribution and comparison of MPDS among middle school students in  
270 Guangzhou with different family conditions(N=1883; n/%)

| Variables                                | Total n (%) | Non-MPDS group<br>(n=1694) | MPDSgroup<br>(n=189) | Fisher<br>* / $\chi^2$ | P value |
|------------------------------------------|-------------|----------------------------|----------------------|------------------------|---------|
| Family residence                         |             |                            |                      |                        |         |
| Rural area/Town                          | 725(38.5)   | 646(38.1)                  | 79(41.8)             | 0.964                  | 0.326   |
| City                                     | 1158(61.5)  | 1048(61.9)                 | 110(58.2)            |                        |         |
| Father's Education                       |             |                            |                      |                        |         |
| Elementary school or below               | 100(5.3)    | 84(5.0)                    | 16(8.5)              |                        |         |
| Junior high school                       | 668(35.5)   | 597(35.2)                  | 71(37.6)             |                        |         |
| Senior high/ Technical secondary school  | 636(33.8)   | 588(34.7)                  | 48(25.4)             | 10.497                 | 0.033   |
| Junior college/ Vocational university    | 253(13.4)   | 221(13.2)                  | 32(16.9)             |                        |         |
| Bachelor's degree or above               | 226(12.0)   | 204(12.0)                  | 22(11.6)             |                        |         |
| Mother's education                       |             |                            |                      |                        |         |
| Elementary school or below               | 193(10.2)   | 175(10.3)                  | 18(9.5)              |                        |         |
| Junior high school                       | 737(39.1)   | 666(39.3)                  | 71(37.6)             | 6.784                  | 0.148   |
| Senior high / Technical secondary school | 519(27.6)   | 464(27.4)                  | 55(29.1)             |                        |         |
| Junior college/Vocational university     | 233(12.4)   | 201(11.9)                  | 32(16.9)             |                        |         |

|                            |            |            |           |        |        |
|----------------------------|------------|------------|-----------|--------|--------|
| Bachelor's degree or above | 201(10.7)  | 188(11.1)  | 13(6.9)   |        |        |
| Father's parenting style   |            |            |           |        |        |
| Democratic                 | 1023(54.3) | 947(55.9)  | 76(40.2)  |        |        |
| Authoritarian              | 401(21.3)  | 343(20.2)  | 58(30.7)  | 18.413 | <0.001 |
| Indulgent                  | 442(23.5)  | 389(23.0)  | 53(28.0)  |        |        |
| Spoiling                   | 17(0.9)    | 15(0.9)    | 2(1.1)    |        |        |
| Mother's parenting style   |            |            |           |        |        |
| Democratic                 | 1083(57.5) | 989(58.4)  | 94(49.7)  |        |        |
| Authoritarian              | 372(19.8)  | 329(19.4)  | 43(22.8)  | 5.684  | 0.118  |
| Indulgent                  | 405(21.5)  | 356(21.0)  | 49(25.9)  |        |        |
| Spoiling                   | 23(1.2)    | 20(1.2)    | 3(1.6)    |        |        |
| Father's caring level      |            |            |           |        |        |
| Very caring                | 935(49.7)  | 864(51.0)  | 71(37.6)  |        |        |
| Average                    | 807(42.9)  | 708(41.8)  | 99(52.4)  | 12.475 | 0.002  |
| Doesn't care               | 141(7.5)   | 122(7.2)   | 19(10.1)  |        |        |
| Mother's caring level      |            |            |           |        |        |
| Very caring                | 1257(66.8) | 1138(67.2) | 119(63.0) |        |        |
| Average                    | 541(28.7)  | 478(28.2)  | 63(33.3)  | 2.307  | 0.315  |
| Not caring                 | 85(4.5)    | 78(4.6)    | 7(3.7)    |        |        |

271 \*Fisher: Fisher exact test

272

273

274 Table 5 Distribution and comparison of MPDS among middle school students  
275 with different mobile phone usages

| Variables                               | Total n(%) | Non-MPDS group<br>(n=1694) | MPDS group<br>(n=189) | $\chi^2$ | P value |
|-----------------------------------------|------------|----------------------------|-----------------------|----------|---------|
| Number of mobile phones currently owned |            |                            |                       |          |         |
| 0                                       | 144(7.6)   | 133(7.9)                   | 11(5.8)               |          |         |
| 1                                       | 1394(74.0) | 1270(75.0)                 | 124(65.6)             | 17.994   | <0.001  |
| 2                                       | 257(13.6)  | 221(13.0)                  | 36(19.0)              |          |         |
| More than 2                             | 88(4.7)    | 70(4.1)                    | 18(9.5)               |          |         |
| Years of mobile phone ownership         |            |                            |                       |          |         |
| [0,2] years                             | 609(32.3)  | 565(33.4)                  | 44(23.3)              | 14.015   | 0.001   |
| (2,4] years                             | 564(30.0)  | 513(30.3)                  | 51(27.0)              |          |         |

|                                                      |            |            |           |        |        |
|------------------------------------------------------|------------|------------|-----------|--------|--------|
| (4,+∞) years                                         | 710(37.7)  | 616(36.4)  | 94(49.7)  |        |        |
| Time spent on mobile phone time on study days        |            |            |           |        |        |
| [0,0.5] hours                                        | 1112(59.1) | 1014(59.9) | 98(51.9)  | 18.823 | <0.001 |
| (0.5,1] hour                                         | 309(16.4)  | 288(17.0)  | 21(11.1)  |        |        |
| (1,+∞) hour                                          | 462(24.5)  | 392(23.1)  | 70(37.0)  |        |        |
| Time spent on mobile phone on rest days              |            |            |           |        |        |
| [0,2] hours                                          | 530(28.1)  | 499(29.5)  | 31(16.4)  | 66.104 | <0.001 |
| (2,6] hours                                          | 960(51.0)  | 884(52.2)  | 76(40.2)  |        |        |
| (6,+∞) hours                                         | 393(20.9)  | 311(18.4)  | 82(43.4)  |        |        |
| The most important motivation for using mobile phone |            |            |           |        |        |
| Information acquisition                              | 334(17.7)  | 319(18.8)  | 15(7.9)   |        |        |
| Interpersonal                                        |            |            |           | 20.969 | <0.001 |
| Communication/ self-expression                       | 668(35.5)  | 599(35.4)  | 69(36.5)  |        |        |
| Entertainment                                        | 816(43.3)  | 713(42.1)  | 103(54.4) |        |        |
| Others                                               | 65(3.5)    | 63(3.7)    | 2(1.1)    |        |        |
| Main application of phone use                        |            |            |           |        |        |
| Interpersonal                                        |            |            |           |        |        |
| Communication                                        | 779(41.4)  | 705(41.6)  | 74(39.2)  | 12.285 | 0.002  |
| Entertainment                                        | 759(40.3)  | 664(39.2)  | 95(50.3)  |        |        |
| Information acquisition or others                    | 345(18.3)  | 325(19.2)  | 20(10.6)  |        |        |
| Average monthly mobile phone expense                 |            |            |           |        |        |
| Less than 50 RMB                                     | 1151(61.1) | 1047(61.8) | 104(55.0) | 4.758  | 0.093  |
| 50~100RMB                                            | 537(28.5)  | 479(28.3)  | 58(30.7)  |        |        |
| More than 100RMB                                     | 195(10.4)  | 168(9.9)   | 27(14.3)  |        |        |
| Average monthly Internet traffic                     |            |            |           |        |        |
| Don't surfing                                        | 123(6.5)   | 118(7.0)   | 5(2.6)    | 21.883 | <0.001 |
| 10Gb and below                                       | 1347(71.5) | 1228(72.5) | 119(63.0) |        |        |
| More than 10Gb                                       | 413(21.9)  | 348(20.5)  | 65(34.4)  |        |        |

276

277 **3.6 Multivariate binary logistic analysis of MPDS among**  
278 **middle school students in Guangzhou (N=1883)**

279 We set the "Non-MPDS" group as the reference group and variables whose P-  
280 value less than 0.05 in the univariate analysis were included to establish a binary  
281 logistic regression model. Omnibus test of the model coefficients was significant  
282 ( $P < 0.001$ ). The result of the Hosmer Lemercio test showed that the binary logistic  
283 model is well fitted to observations ( $P > 0.05$ ).

284 Binary logistic regression (table 6) showed that the associated factors for  
285 developing MPDS were girl (adjusted  $OR=1.772$ , 95%  $CI:1.239-2.532$ ), grade of high  
286 school ( $aOR=1.479$ , 95%  $CI:1.014-2.155$ ), introverted personality ( $aOR=1.686$ ,  
287 95%  $CI:1.108-2.566$ ), father's authoritarian parenting styles ( $aOR=2.023$ ,  
288 95%  $CI:1.315-3.111$ ), spending 6 hours above on phone on rest days ( $aOR=3.115$ ,  
289 95%  $CI:1.829-5.307$ ), motivation of interpersonal communication or self-expression  
290 ( $aOR=2.197$ , 95%  $CI:1.183-4.079$ ), and motivation of entertainment ( $aOR=2.527$ ,  
291 95%  $CI:1.381-4.624$ ).

292 Table 6 Multivariate binary logistic regression analysis of MPDS among middle  
293 school students in Guangzhou, China

| Influencing factors | <i>P</i> value | <i>aOR</i> | 95% <i>CI</i> |
|---------------------|----------------|------------|---------------|
| Gender              |                |            |               |

|                                                     |       |       |             |
|-----------------------------------------------------|-------|-------|-------------|
| Male(reference)                                     |       |       |             |
| Female                                              | 0.002 | 1.772 | 1.239~2.532 |
| Grade                                               |       |       |             |
| Junior high school(reference)                       |       |       |             |
| Senior high School                                  | 0.042 | 1.479 | 1.014~2.155 |
| Character                                           |       |       |             |
| Uncertain(reference)                                |       |       |             |
| Outgoing                                            | 0.447 | 1.180 | 0.770~1.806 |
| Introverted                                         | 0.015 | 1.686 | 1.108~2.566 |
| Father's parenting style                            |       |       |             |
| Democratic(reference)                               |       |       |             |
| Authoritarian                                       | 0.001 | 2.023 | 1.315~3.111 |
| Indulgent                                           | 0.064 | 1.485 | 0.978~2.255 |
| Spoiling                                            | 0.594 | 1.527 | 0.321~7.259 |
| Time spent on mobile phone<br>on rest days          |       |       |             |
| [0,2] hours(reference)                              |       |       |             |
| (2,6] hours                                         | 0.316 | 1.288 | 0.785~2.115 |
| (6,+∞)hours                                         | 0.001 | 3.115 | 1.829~5.307 |
| Most important motivation for<br>using mobile phone |       |       |             |
| Information access(reference)                       |       |       |             |
| Interpersonal communication<br>or self-expression   | 0.013 | 2.197 | 1.183~4.079 |
| Entertainment                                       | 0.003 | 2.527 | 1.381~4.624 |
| Others                                              | 0.793 | 0.755 | 0.093~6.129 |

294 \*Statistical significance at  $p < 0.05$ .

295 *aOR*: adjusted OR.

296

297

298



## 299 Discussion

300 In MPDS Scale, we found that the mean score for each item of prominence was  
301 highest (2.90) while compulsivity was the lowest (1.71). Among the 189 students with  
302 MPDS, the highest mean score for each item was still prominence (3.89) and  
303 compulsivity stayed lowest (2.77), which indicated that principal manifestations of the  
304 syndrome of students with MPDS were negative emotional reactions when they are  
305 unable to use phone and daily behavior dominated by phone use, such as phone  
306 overuse and excessive checking of phone.

307 We calculated that the prevalence of MPDS in our study was 10.0%, which was  
308 similar to the results of studies in Korea, Spain and Belgium[25-27]. Our results  
309 showed that prevalence of being injured caused by overfocusing on mobile phone  
310 was 11.9% and it was 29.4% in students with MPDS. Some surveys showed that  
311 10.7% of teenagers reported being struck or nearly struck by a vehicle because of  
312 talking on the phone and 7.7% reported texting [28]. As the number of mobile phones  
313 in use increases and the time spent on them increases, the numbers of injuries may  
314 also increase [29]. These findings suggest that the problem of mobile phone overuse  
315 among adolescents need urgent and appropriate intervention.

316            Similar to the results of us, other studies had reported that females are more  
317 likely to develop MPDS than males ( $aOR = 1.772$ )[30-32], which may be related to  
318 the fact that adolescent girls need more emotional satisfaction in social relationships  
319 than males and are more inclined to express their feelings through text messaging  
320 via mobile phone chatting applications. This suggests that school and family should  
321 strengthen emotional support and care for female middle school students

322            Compared to junior high school students, senior high school students were more  
323 likely to develop MPDS ( $aOR = 1.479$ ). A survey on mobile phone dependence for  
324 middle school students in Xiamen, China, showed that high school students had  
325 higher dependence on mobile phones[33]. A possible explanation for this could be  
326 that Chinese senior high school students get heavy study burden and face a lot of  
327 pressure from entrance exam for university. Senior high school students are more  
328 likely to have difficulty in controlling their mobile phone use[33], and may use their  
329 mobile phones to relieve burnout. Therefore, it is advisable for senior high schools to  
330 provide psychological counseling regularly and alleviate academic burden for  
331 students, empowering them to deal with study pressure and problems of mobile  
332 phone dependence.

333            The results showed that introverted students had a higher risk of developing  
334 MPDS than students with uncertain personalities ( $aOR = 1.686$ ). Students with

335 'uncertain personality' might be in the middle status between introversion and  
336 extroversion so that they were not sure whether they are introverted or extroverted.  
337 Middle school students with introverted personality may have been out of real-life  
338 interactions for a long time and lack the opportunity to interact with people face to  
339 face[34]. Some studies have indicated that both introverts or extroverts might be  
340 addicted to mobile phone, but introverts are more likely to use mobile phones as a  
341 programming tool and instrumental means, while extroverts use mobile phones more  
342 for socialization[35].

343 Our study found that students whose father with authoritarian parenting styles  
344 had a higher risk of developing MPDS ( $aOR = 2.023$ ). A study in Indonesia found that  
345 authoritative parenting style is positively associated with mobile phone dependence:  
346 the more authoritarian parenting style parents are, the more likely mobile phone  
347 dependence children develop [36]. Interaction of parent-child cohesion and parent-  
348 child relationship quality is negatively related to mobile phone dependence [37]. In  
349 addition, a study on the correlation between family cohesion and mobile phone  
350 addiction showed that family cohesion was negatively correlated with mobile phone  
351 dependence [38] and individuals who grow up in a harmonious family and feel more  
352 emotional warmth will develop secure attachment for family, which reduces the  
353 likelihood of developing mobile phone dependence [39]. Therefore, the control of

354 MPDS can start from family environment, such as, specifically, creating a democratic  
355 family atmosphere and communicating more with children.

356 In our study, spending 6 hours above on phone on rest days ( $aOR = 3.115$ ) and  
357 mobile phone use motivated by interpersonal communication or self-expression ( $aOR$   
358 = 2.197) and entertainment ( $aOR = 2.527$ ) may be risk factors for MPDS. In rest days  
359 (weekends and holidays), students have more disposable time, may increase the  
360 risk of excessive mobile phone use. Related studies show that there is a significant  
361 positive correlation between mobile phone use motivation and mobile phone  
362 dependence [40]. Smartphones meet people's need for entertainment and  
363 socialization, but they may have the risk of being overused [41, 42], which may also  
364 increase the duration of mobile phone use. Middle school students should establish a  
365 correct view of mobile phone and realize that phone is also an effective learning tool.

366 This study has the following limitations. Firstly, sample of this study was from  
367 eight middle schools in Liwan and Nansha districts of Guangzhou. Although it was a  
368 multicenter study, the sample size was not large, for which reason that potential  
369 influencing factors may not be identified. Secondly, this study was a cross-sectional  
370 study and it was unable to confirm causal relationship between different factors and  
371 MPDS. More longitudinal studies are needed in future.

372           In any case, this study revealed recent prevalence of MPDS and being injured  
373   caused by overfocusing on phone of middle school students in Guangzhou, China.  
374   And we found some associated factors contributing to developing MPDS among  
375   them.

## 376 **Acknowledgments**

377       The authors thank all the participating students and their cooperation. Sincerely  
378 thank the officials of middle schools we surveyed for their great support. The authors  
379 also thank experts who gave advice on the revision of the questionnaire and all the  
380 investigators who collected the original data in eight middle schools for their hard  
381 work.

## 382 **Contributors**

383       CW and HZ were responsible for the data analysis and were the major  
384 contributor for writing the manuscript. RL, HL, JL, MS, WL and QZ were responsible  
385 for research design, questionnaire design and quality control. BH, JZ, YY and YL  
386 participated in the field investigation, data collation and enter. RZ and QW  
387 participated in partial writing of the manuscript. XD gave valuable advice for the  
388 revision of the whole article.

## 389 **Funding**

390       This study was supported by the Medical Science and Technology Research  
391 Foundation of Guangdong (B2022109).

## 392 **Competing interests**

393 The authors have declared that no competing interest exist.

## 394 **Ethics approval**

395 This study was reviewed and approved by the Ethics Committee of Guangzhou  
396 Center for Disease Control and Prevention, Guangzhou, China (approval number  
397 GZCDC-ECHR-2024P0095). Informed consent was obtained from all the student  
398 participants.

## 399 **Data availability**

400 All relevant data are within the paper and Supporting Information files.

## 401 REFERENCES

- 402 1. Billieux J, Maurage P, Lopez-Fernandez O, Kuss DJ, Griffiths MD. Can disordered mobile  
403 phone use be considered a behavioral addiction? An update on current evidence and a  
404 comprehensive model for future research. *Current Addiction Reports*. 2015;2:156-62.
- 405 2. Li Y, Li G, Liu L, Wu H. Correlations between mobile phone addiction and anxiety,  
406 depression, impulsivity, and poor sleep quality among college students: A systematic review  
407 and meta-analysis. *Journal of Behavioral Addictions*. 2020;9:551 - 71.
- 408 3. Simmons SM, Caird JK, Ta A, Sterzer F, Hagel BE. Plight of the distracted pedestrian: A  
409 research synthesis and meta-analysis of mobile phone use on crossing behaviour. *Injury*  
410 *Prevention*. 2020;26:170 - 6.
- 411 4. Jiang Z, Zhao X. Brain behavioral systems, self-control and problematic mobile phone use:  
412 The moderating role of gender and history of use. *Personality and Individual Differences*.  
413 2017;106:111-6.
- 414 5. Lopez-Fernandez O, Honrubia-Serrano ML, Freixa-Blanxart M. Spanish adaptation of the  
415 "Mobile Phone Problem Use Scale" for adolescent population. *Adicciones*. 2012;24(2):123-30.
- 416 6. Tao S, Wu X, Wan Y, Zhang S-c, Hao Jh, Tao F. Interactions of problematic mobile phone  
417 use and psychopathological symptoms with unintentional injuries: A school-based sample of  
418 Chinese adolescents. *BMC Public Health*. 2015;16:1-10.



- 419 7. Wang C, Lee MKO, Hua Z. A theory of social media dependence: Evidence from microblog  
420 users. *Decis Support Syst.* 2015;69:40-9.
- 421 8. Long J, Liu T, Liao Y-h, Qi C, He H, Chen S, et al. Prevalence and correlates of problematic  
422 smartphone use in a large random sample of Chinese undergraduates. *BMC Psychiatry.*  
423 2016;16(1):1-12.
- 424 9. Pan H, Zhang M, Huang J. A meta-analysis of the relationship between mobile phone  
425 addiction and loneliness of college students in China. 2020 Conference on Social Science and  
426 Modern Science (SSMS2020). 2020;39(02):260-9.
- 427 10. Durusoy R, Hassoy H, Özkurt A, Karababa A. Mobile phone use, school electromagnetic  
428 field levels and related symptoms: A cross-sectional survey among 2150 high school students  
429 in Izmir. *Environmental Health.* 2017;16(1):1-14.
- 430 11. Jiang X, Hardy LL, Ding D, Baur LA, Shi H-j. Recreational screen-time among Chinese  
431 adolescents: A cross-sectional study. *Journal of Epidemiology.* 2014;24:397 - 403.
- 432 12. Sánchez-Carbonell X, Beranuy M, Castellana M, Chamarro A, Oberst U. Internet and cell  
433 phone addiction: Passing fad or disorder? *Adicciones.* 2008;20(2):149-59.
- 434 13. Zheng F, Gao P, He M, Li M, Wang C, Zeng Q, et al. Association between mobile phone  
435 use and inattention in 7102 Chinese adolescents: A population-based cross-sectional study.  
436 *BMC Public Health.* 2014;14(1):1-7.
- 437 14. Bianchi A, Phillips JG. Psychological predictors of problem mobile phone use.

- 438 Cyberpsychology & behavior : the impact of the Internet, multimedia and virtual reality on  
439 behavior and society. 2005;8(1):39-51.
- 440 15. Leung L. Linking psychological attributes to addiction and improper use of the mobile  
441 phone among adolescents in Hong Kong. Journal of Children and Media. 2008;2:113 - 93.
- 442 16. Billieux J, Linden MVd, Rochat L. The role of impulsivity in actual and problematic use of  
443 the mobile phone. Applied Cognitive Psychology. 2008;22:1195-210.
- 444 17. H. WX. Research on the situation of mobile phone dependency and the relationship among  
445 MPD, social support and social adaptation for middle school student. Master's dissertation)  
446 Fujian Normal University. 2011.
- 447 18. Bao Q, Zheng Z, Qu Z. The effect of parental control on smartphone dependence among  
448 boarding and non-boarding middle school students: The moderating effect of teacher  
449 leadership behavior. Advances in Psychology. 2023;3:1030-8.
- 450 19. Pedrero Pérez EJ, Rodríguez Monje MT, Ruíz Sánchez de León JM. Mobile phone abuse  
451 or addiction. A review of the literature. Adicciones. 2012;24(2):139-52.
- 452 20. Martinotti G, Vilella C, Di Thiene D, Di Nicola M, Bria P, Conte GL, et al. Problematic  
453 mobile phone use in adolescence: A cross-sectional study. Journal of Public Health.  
454 2011;19:545-51.
- 455 21. Sánchez-Martínez M, Otero A. Factors associated with cell phone use in adolescents in  
456 the community of Madrid (Spain). Cyberpsychology & behavior : the impact of the Internet,

- 457 multimedia and virtual reality on behavior and society. 2009;12(2):131-7.
- 458 22. Lee H, Kim MS, Son HK, Ahn S, Kim JS, Kim YH. Discriminating power of socio-  
459 demographic and psychological variables on addictive use of cellular phones among middle  
460 school students. *Taehan Kanho Hakhoe chi*. 2007;37(6):957-65.
- 461 23. Qiu. H. Research on mobile phone dependence and education strategy of senior one  
462 students. *Advances in Psychology*. 2021;1:114-25.
- 463 24. Van der Linden M. Commentary on: Are we overpathologizing everyday life? A tenable  
464 blueprint for behavioral addiction research. *Journal of Behavioral Addictions*. 2015;4:145 - 7.
- 465 25. Lee H, Kim MS, Son HK, Ahn S, Kim JS, Kim YH. Discriminating power of socio-  
466 demographic and psychological variables on addictive use of cellular phones among middle  
467 school students. *Taehan Kanho Hakhoe chi*. 2007;37(6):957-65.
- 468 26. Lopez-Fernandez O, Honrubia-Serrano ML, Freixa-Blanxart M. Spanish adaptation of the  
469 "Mobile Phone Problem Use Scale" for adolescent population. *Adicciones*. 2012;24(2):123-30.
- 470 27. Lopez-Fernandez O. Short version of the Smartphone Addiction Scale adapted to Spanish  
471 and French: Towards a cross-cultural research in problematic mobile phone use. *Addictive*  
472 *behaviors*. 2017;64:275-80.
- 473 28. Quon P, Lahey K, Grisdale M, Hagel BE, Frost GA, Belton KL, et al. Prevalence of  
474 distracted walking with mobile technology: An observational study of Calgary and Edmonton  
475 high school students. *Canadian Journal of Public Health*. 2019;110(4):506-11.

- 476 29. Nasar JL, Troyer D. Author's personal copy accident analysis and prevention pedestrian  
477 injuries due to mobile phone use in public places. 2013;57:91-5.
- 478 30. Li L, Lok GKI, Mei S-L, Cui XL, Li L, Ng CH, et al. The severity of mobile phone addiction  
479 and its relationship with quality of life in Chinese university students. PeerJ. 2020;8:e8859.
- 480 31. Wen H, Yun X. On relationship among college students' mobile phone addiction,  
481 psychological needs and mobile phone use. Journal of Southwest China Normal University  
482 (Natural Science Edition). 2021;46(2):105-11.
- 483 32. Yi Q, Lu-wen Z, Xiao Z, Hui W, Zhou Y, Sun J. Cell phone addiction and apps activities  
484 among Chinese medical students: Prevalence and risk factors. Journal of Men's Health.  
485 2020;16:27-38.
- 486 33. Li Y, Wang Z, You W, Liu X. Core self-evaluation, mental health and mobile phone  
487 dependence in Chinese high school students: Why should we care. Italian Journal of Pediatrics.  
488 2022;48(1):28.
- 489 34. Li X, Feng X, Xiao W, Zhou H. Loneliness and mobile phone addiction among Chinese  
490 college students: The mediating roles of boredom proneness and self-control. Psychology  
491 Research and Behavior Management. 2021;14:687 - 94.
- 492 35. James RJE, Dixon G, Dragomir M-G, Thirlwell E, Hitcham L. Understanding the  
493 construction of 'behavior' in smartphone addiction: A scoping review. Addictive behaviors.  
494 2022;137:107503.

- 495 36. Nur H, Setyaningrum P, Novandita A. Permissive, authoritarian, and authoritative  
496 parenting style and smartphone addiction on university students. *Journal of Educational, Health  
497 and Community Psychology*. 2021;10:3-4.
- 498 37. Mi Z, Cao W, Diao W, Wu M, Fang X. The relationship between parental phubbing and  
499 mobile phone addiction in junior high school students: A moderated mediation model. *Frontiers  
500 in Psychology*. 2023;14:1117221.
- 501 38. Lian S, Cao X, Xiao Q-L, Zhu X-W, Yang C, Liu Q. Family cohesion and adaptability  
502 reduces mobile phone addiction: The mediating and moderating roles of automatic thoughts  
503 and peer attachment. *Frontiers in Psychology*. 2023;14:1122943.
- 504 39. Liu Q, Yang X, Hu Y-t, Zhang C-Y, Nie Y. How and when is family dysfunction associated  
505 with adolescent mobile phone addiction? Testing a moderated mediation model. *Children and  
506 Youth Services Review*. 2020;111:104827.
- 507 40. Wen F, Ding Y, Yang C, Ma S, Zhu J, Xiao H, et al. Influence of smartphone use motives  
508 on smartphone addiction during the COVID-19 epidemic in China: The moderating effect of  
509 age. *Current Psychology (New Brunswick, Nj)*. 2022;42:19316-25.
- 510 41. Shen X, Wang H-Z, Rost DH, Gaskin JE, Wang J-L. State anxiety moderates the  
511 association between motivations and excessive smartphone use. *Current Psychology*.  
512 2019;40(4):1937-45.
- 513 42. Wang J-L, Wang H-Z, Gaskin JE, Wang L-H. The role of stress and motivation in

514 problematic smartphone use among college students. *Comput Hum Behav.* 2015;53:181-8.

515

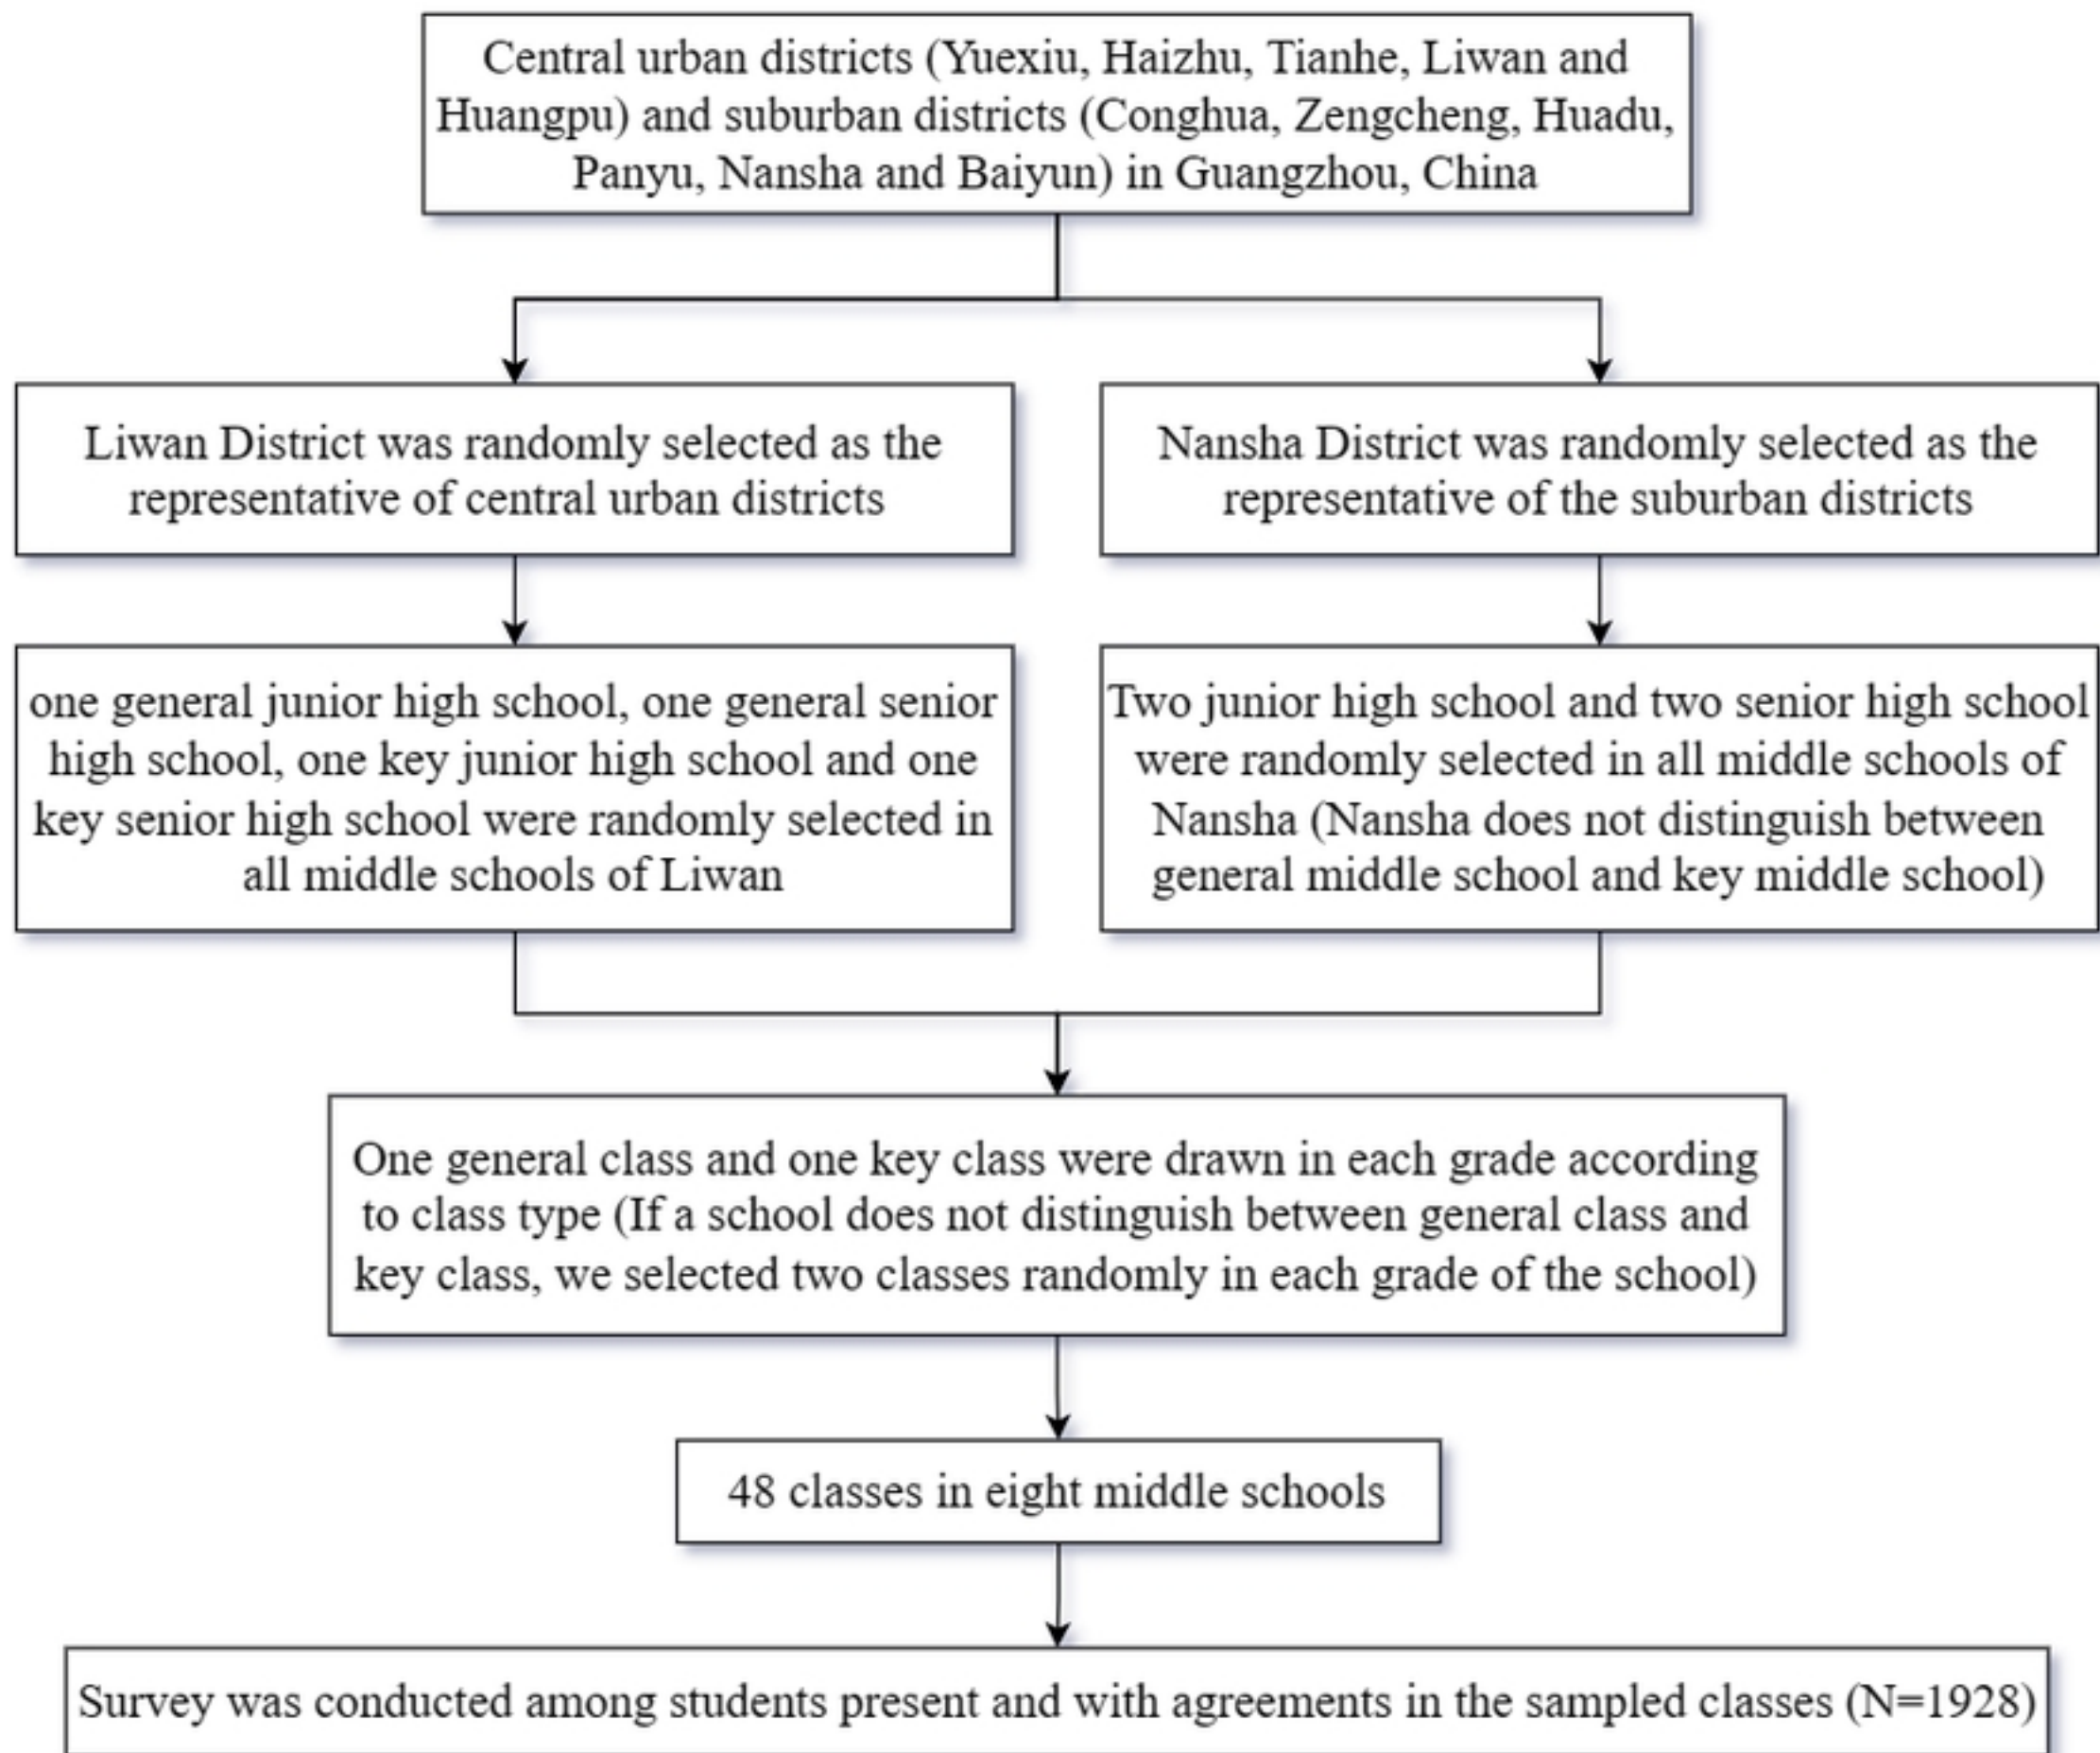

fig1
